# Supplementary material for: Nanoparticle co-delivery of carboplatin and PF543 restores platinum sensitivity in ovarian cancer models through inhibiting platinum-induced pro-survival pathway activation
Source: Royal Society of Chemistry journal article supplement (doi:10.1039/d4na00227j), 2024-01-01
Supplement: d4na00227j1.pdf [file d4na00227j1.pdf]

**Table S1.** Hydrodynamic size and Zeta potential of different samples measured by DLS.

| <b>samples</b> | <b>D<sub>h</sub>(nm)<sup>a</sup></b> | <b>PDI<sup>b</sup></b> | <b>ζ Poteintial(mV)</b> |
|----------------|--------------------------------------|------------------------|-------------------------|
| NPs            | 152.8                                | 0.283                  | -33.45                  |
| CNPs           | 187.5                                | 0.202                  | -35.98                  |
| PNPs           | 158.6                                | 0.399                  | -37.18                  |
| C/PNPs         | 187.9                                | 0.365                  | -35.53                  |

<sup>a</sup> The hydrodynamic size of nanoparticles were measured by DLS;

<sup>b</sup> Polydispersity index.

**Table S2.** Encapsulation efficiency and drug loading content of various nanoparticle formulations.

| <b>samples</b> | <b>EE<sup>a</sup> of CBP (%)</b> | <b>EE<sup>a</sup> of PF543 (%)</b> |
|----------------|----------------------------------|------------------------------------|
| CNPs           | 84.89 ± 0.12%                    | -                                  |
| PNPs           | -                                | 92.02 ± 0.05%                      |
| C/PNPs         | 82.37 ± 0.13%                    | 89.23 ± 0.03%                      |

<sup>a</sup> Encapsulation efficiency; Data are shown as mean ± SD (n=3).
